# Supplementary material
Source: PubMed Central journal article supplement (PMC2948784)

Table (Supplemental Digital Content 1)

Corrected recognition (proportion of old faces correctly identified as old – proportion of new faces incorrectly identified as old) of angry and neutral faces by stress and control males and females. Standard errors of the means are in parentheses.

| <u>Participant Group</u> | <u>Angry</u> | <u>Neutral</u> |
|--------------------------|--------------|----------------|
| Control Female           | .42 (.05)    | .43 (.04)      |
| Control Male             | .37 (.05)    | .42 (.04)      |
| Stress Female            | .47 (.05)    | .49 (.04)      |
| Stress Male              | .49 (.05)    | .44 (.04)      |

Supplemental Digital Content 2. Number of voxels, p values, and MNI coordinates and brain regions for local maxima associated with the PPI clusters shown in Figures 2A-C. All significant clusters for the sex by stress interaction PPI analyses are listed in this table (including those not visible in the slices shown in the figure).

| <b>FFA (Figure 2A)</b> |        |       |       |       |       |                          |              |
|------------------------|--------|-------|-------|-------|-------|--------------------------|--------------|
| Cluster # in figure    | Voxels | p     | X MNI | Y MNI | Z MNI | Region                   | Brodman Area |
| 1                      | 339    | 0.037 | 48    | 24    | -4    | Inferior Frontal Gyrus   | 47           |
|                        |        |       | 42    | 22    | -6    | Insula                   | 13           |
|                        |        |       | 30    | 24    | -16   | Sub-Gyral                | 47           |
|                        |        |       | 50    | 16    | -8    | Inferior Frontal Gyrus   | 47           |
|                        |        |       | 32    | 18    | -14   | Extra-Nuclear            | 13           |
|                        |        |       | 62    | 8     | -4    | Superior Temporal Gyrus  | 22           |
| 2                      | 503    | 0.004 | 52    | -46   | -8    | Sub-Gyral                | 37           |
|                        |        |       | 64    | -60   | 8     | Middle Temporal Gyrus    | 21           |
|                        |        |       | 56    | -48   | -10   | Sub-Gyral                | 37           |
|                        |        |       | 66    | -54   | -2    | Middle Temporal Gyrus    | 37           |
|                        |        |       | 66    | -52   | 10    | Superior Temporal Gyrus  | 22           |
|                        |        |       | 50    | -62   | 4     | Middle Temporal Gyrus    | 37           |
| 3                      | 3106   | 0.000 | -50   | -78   | -2    | Middle Occipital Gyrus   | 19           |
|                        |        |       | 6     | -86   | 6     | Lingual Gyrus            | 18           |
|                        |        |       | -50   | -62   | 2     | Middle Temporal Gyrus    | 37           |
|                        |        |       | -10   | -90   | 26    | Cuneus                   | 18           |
|                        |        |       | -52   | -64   | -2    | Inferior Temporal Gyrus  | 19           |
|                        |        |       | 12    | -70   | -10   | Culmen                   |              |
| 4*                     | 351    | 0.031 | -36   | -46   | 44    | Inferior Parietal Lobule | 40           |
|                        |        |       | -48   | -40   | 62    | Inferior Parietal Lobule | 40           |
|                        |        |       | -44   | -52   | 56    | Inferior Parietal Lobule | 40           |
|                        |        |       | -54   | -36   | 52    | Inferior Parietal Lobule | 40           |
|                        |        |       | -50   | -38   | 50    | Inferior Parietal Lobule | 40           |
|                        |        |       | -48   | -54   | 62    | Inferior Parietal Lobule | 40           |
| 5*                     | 336    | 0.039 | -48   | 26    | 42    | Middle Frontal Gyrus     | 8            |
|                        |        |       | -34   | 40    | 44    | Middle Frontal Gyrus     | 8            |
|                        |        |       | -28   | 38    | 44    | Middle Frontal Gyrus     | 8            |
|                        |        |       | -24   | 42    | 44    | Superior Frontal Gyrus   | 8            |
|                        |        |       | -44   | 32    | 38    | Middle Frontal Gyrus     | 8            |
|                        |        |       | -44   | 30    | 42    | Middle Frontal Gyrus     | 8            |

\*cluster not in figure

| <b>R Amygdala (Figure 2B)</b> |        |       |       |       |       |                         |              |
|-------------------------------|--------|-------|-------|-------|-------|-------------------------|--------------|
| Cluster # in figure           | Voxels | p     | X MNI | Y MNI | Z MNI | Region                  | Brodman Area |
| 1                             | 311    | 0.038 | 56    | 12    | -2    | Superior Temporal Gyrus | 22           |
|                               |        |       | 54    | 8     | -2    | Superior Temporal Gyrus | 22           |
|                               |        |       | 50    | 6     | -2    | Insula                  | 13           |
|                               |        |       | 52    | 22    | -8    | Inferior Frontal Gyrus  | 47           |

|    |      |       |     |     |     |                          |    |
|----|------|-------|-----|-----|-----|--------------------------|----|
| 2  | 305  | 0.042 | 44  | 24  | -6  | Inferior Frontal Gyrus   | 47 |
|    |      |       | 38  | 30  | -8  | Inferior Frontal Gyrus   | 47 |
|    |      |       | -50 | 16  | -8  | Inferior Frontal Gyrus   | 47 |
|    |      |       | -44 | 6   | -8  | Insula                   | 13 |
|    |      |       | -56 | 12  | -14 | Superior Temporal Gyrus  | 22 |
|    |      |       | -50 | 8   | -6  | Superior Temporal Gyrus  | 22 |
| 3  | 532  | 0.001 | -38 | 2   | -18 | Superior Temporal Gyrus  | 38 |
|    |      |       | -48 | 8   | -12 | Superior Temporal Gyrus  | 38 |
|    |      |       | 32  | -90 | 12  | Middle Occipital Gyrus   | 19 |
|    |      |       | 40  | -72 | 12  | Middle Occipital Gyrus   | 19 |
|    |      |       | 30  | -82 | 0   | Middle Occipital Gyrus   | 18 |
|    |      |       | 40  | -96 | 10  | Middle Occipital Gyrus   | 19 |
| 4  | 1054 | 0.000 | 42  | -92 | 14  | Middle Occipital Gyrus   | 18 |
|    |      |       | 40  | -88 | 2   | Middle Occipital Gyrus   | 18 |
|    |      |       | 26  | -74 | 48  | Precuneus                | 7  |
|    |      |       | 20  | -76 | 54  | Precuneus                | 7  |
|    |      |       | 14  | -82 | -2  | Lingual Gyrus            | 18 |
|    |      |       | 32  | -80 | 48  | Precuneus                | 19 |
| 5* | 475  | 0.003 | 14  | -80 | 28  | Cuneus                   | 18 |
|    |      |       | 12  | -90 | 0   | Lingual Gyrus            | 18 |
|    |      |       | -38 | -48 | 54  | Inferior Parietal Lobule | 40 |
|    |      |       | -32 | -54 | 62  | Superior Parietal Lobule | 7  |
|    |      |       | -32 | -54 | 56  | Superior Parietal Lobule | 7  |
|    |      |       | -36 | -76 | 42  | Precuneus                | 19 |
|    |      |       | -20 | -68 | 56  | Precuneus                | 7  |
|    |      |       | -30 | -78 | 50  | Precuneus                | 19 |

\*cluster not in figure

| <b>L Amygdala (Figure 2C)</b> |        |       |       |       |       |                         |               |
|-------------------------------|--------|-------|-------|-------|-------|-------------------------|---------------|
| Cluster # in figure           | Voxels | p     | X MNI | Y MNI | Z MNI | Region                  | Brodmann Area |
| 1                             | 404    | 0.011 | -40   | 26    | 0     | Inferior Frontal Gyrus  | 18            |
|                               |        |       | -60   | 2     | 4     | Superior Temporal Gyrus | 19            |
|                               |        |       | -54   | 14    | -8    | Superior Temporal Gyrus | 19            |
|                               |        |       | -60   | 14    | -12   | Superior Temporal Gyrus | 37            |
|                               |        |       | -44   | 32    | 0     | Inferior Frontal Gyrus  | 18            |
|                               |        |       | -48   | 28    | 0     | Inferior Frontal Gyrus  | 37            |
| 2                             | 1295   | 0.000 | 16    | -80   | -2    | Lingual Gyrus           | 45            |
|                               |        |       | 28    | -60   | -2    | Parahippocampal Gyrus   | 22            |
|                               |        |       | 42    | -80   | 6     | Middle Occipital Gyrus  | 22            |
|                               |        |       | 52    | -70   | 2     | Inferior Temporal Gyrus | 38            |
|                               |        |       | 28    | -80   | 2     | Lingual Gyrus           | 13            |
|                               |        |       | 40    | -68   | 0     | Middle Occipital Gyrus  | 45            |

Supplemental Digital Content 3. This figure is a color version of Fig. 2 that also displays the seed regions used for each psychophysiological interaction (PPI) analysis. See Fig. 2 caption for details.

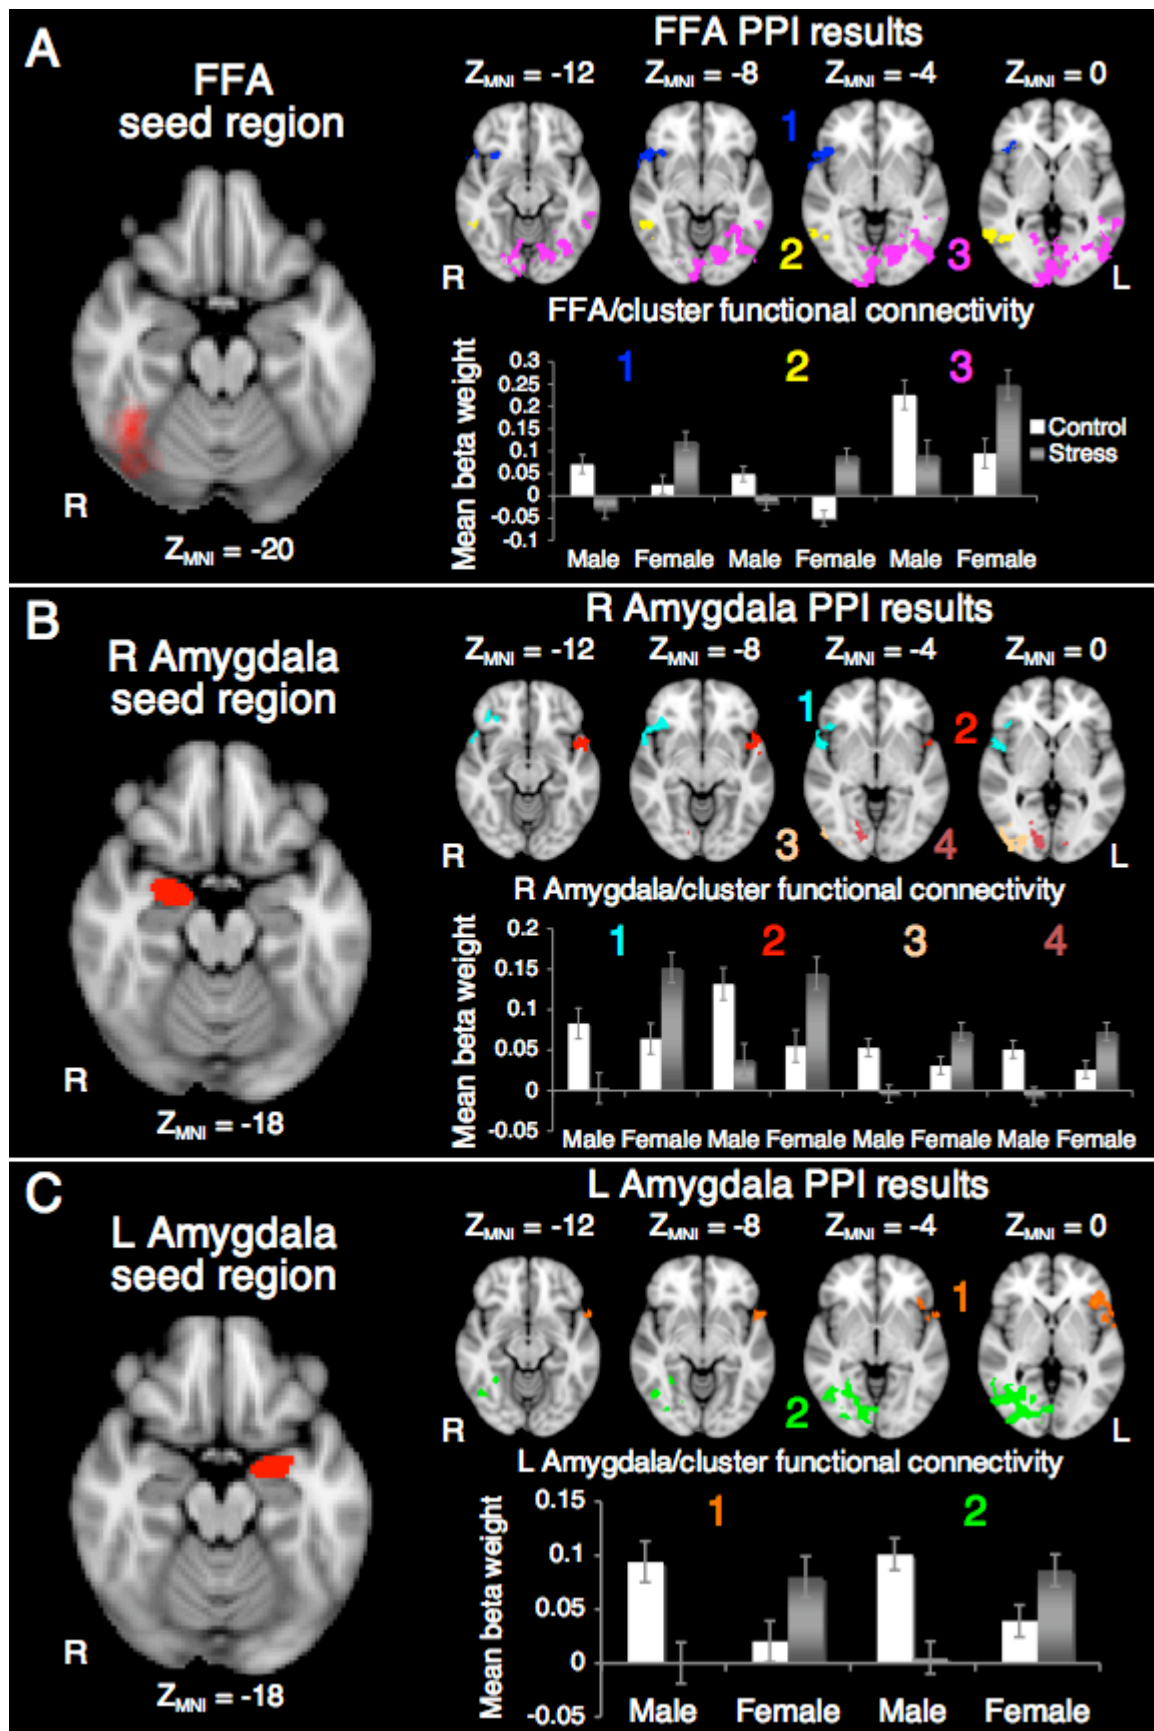

Supplemental Digital Content 4. Number of voxels, p values, and MNI coordinates and brain regions for local maxima associated with significant group main effects for the PPI analyses. All significant clusters are listed in this table (including those not visible in the slices shown in the figure).

| <b>FFA (See Images in Supplemental Digital Content 5A)</b> |                         |       |       |       |                                    |                            |               |
|------------------------------------------------------------|-------------------------|-------|-------|-------|------------------------------------|----------------------------|---------------|
| Effect                                                     | Voxels                  | p     | X MNI | Y MNI | Z MNI                              | Region                     | Brodmann Area |
| F > M                                                      | 326                     | 0.045 | 44    | -8    | 14                                 | Insula                     | 13            |
|                                                            |                         |       | 56    | 2     | 2                                  | Superior Temporal Gyrus    | 22            |
|                                                            |                         |       | 60    | 10    | 4                                  | Precentral Gyrus           | 44            |
|                                                            |                         |       | 62    | 8     | -2                                 | Superior Temporal Gyrus    | 22            |
|                                                            |                         |       | 58    | -2    | 0                                  | Superior Temporal Gyrus    | 22            |
|                                                            | 401                     | 0.015 | 60    | 14    | 2                                  | Precentral Gyrus           | 44            |
|                                                            |                         |       | 6     | -38   | 6                                  | Parahippocampal Gyrus      | 30            |
|                                                            |                         |       | 4     | -24   | 6                                  | Thalamus                   |               |
|                                                            |                         |       | 10    | -48   | 18                                 | Posterior Cingulate        | 29            |
|                                                            |                         |       | 14    | -48   | 20                                 | Posterior Cingulate        | 29            |
|                                                            | 931                     | 0.000 | 0     | -36   | 8                                  |                            |               |
|                                                            |                         |       | 0     | -32   | 8                                  | Thalamus: Pulvinar         |               |
|                                                            |                         |       | -70   | -46   | -10                                | Middle Temporal Gyrus      | 21            |
|                                                            |                         |       | -66   | -36   | 16                                 | Superior Temporal Gyrus    | 22            |
|                                                            |                         |       | -54   | -28   | -18                                | Inferior Temporal Gyrus    | 20            |
|                                                            |                         |       | -62   | -36   | 16                                 | Superior Temporal Gyrus    | 22            |
|                                                            |                         |       | -72   | -36   | -10                                | Middle Temporal Gyrus      | 21            |
|                                                            |                         |       | -64   | -38   | -10                                | Middle Temporal Gyrus      | 21            |
|                                                            |                         |       | 8     | -4    | 10                                 | Thalamus: Anterior Nucleus |               |
|                                                            |                         |       | 42    | 22    | 0                                  | Insula                     | 13            |
| 1119                                                       | 0.000                   | 4     | -4    | 14    | Thalamus                           |                            |               |
|                                                            |                         | 32    | 8     | 4     | Lentiform Nucleus: Putamen         |                            |               |
|                                                            |                         | 32    | 12    | 2     | Clastrum                           |                            |               |
|                                                            |                         | 20    | -2    | 14    | Thalamus: Ventral Anterior Nucleus |                            |               |
|                                                            |                         |       |       |       |                                    |                            |               |
| M > F                                                      | No significant clusters |       |       |       |                                    |                            |               |
| Stress > Control                                           | No significant clusters |       |       |       |                                    |                            |               |
| Control > Stress                                           | No significant clusters |       |       |       |                                    |                            |               |

| <b>R Amygdala (See Images in Supplemental Digital Content 5B)</b> |        |       |       |       |                 |                          |               |                          |    |
|-------------------------------------------------------------------|--------|-------|-------|-------|-----------------|--------------------------|---------------|--------------------------|----|
| Effect                                                            | Voxels | p     | X MNI | Y MNI | Z MNI           | Region                   | Brodmann Area |                          |    |
| F > M                                                             | 336    | 0.025 | 0     | 68    | -12             | Medial Frontal Gyrus     | 10            |                          |    |
|                                                                   |        |       | 2     | 64    | -12             | Medial Frontal Gyrus     | 10            |                          |    |
|                                                                   |        |       | 0     | 44    | -10             | Anterior Cingulate       | 32            |                          |    |
|                                                                   |        |       | -12   | 46    | 2               | Anterior Cingulate       | 32            |                          |    |
|                                                                   |        |       | 2     | 48    | -10             | Anterior Cingulate       | 32            |                          |    |
|                                                                   |        |       | 4     | 44    | -10             | Anterior Cingulate       | 32            |                          |    |
|                                                                   |        |       | 363   | 0.016 | 60              | -58                      | 30            | Superior Temporal Gyrus  | 39 |
|                                                                   |        |       |       |       | 58              | -54                      | 34            | Supramarginal Gyrus      | 40 |
|                                                                   |        |       |       |       | 52              | -58                      | 40            | Inferior Parietal Lobule | 40 |
|                                                                   |        |       |       |       | 48              | -54                      | 42            | Inferior Parietal Lobule | 40 |
|                                                                   | 58     | -46   |       |       | 28              | Inferior Parietal Lobule | 40            |                          |    |
|                                                                   | 441    | 0.005 | 54    | -46   | 28              | Inferior Parietal Lobule | 40            |                          |    |
|                                                                   |        |       | -44   | -42   | 4               |                          |               |                          |    |
|                                                                   |        |       | -54   | -62   | 26              | Middle Temporal Gyrus    | 39            |                          |    |
|                                                                   |        |       | -42   | -46   | 14              |                          |               |                          |    |
|                                                                   |        |       | -52   | -66   | 48              | Inferior Parietal Lobule | 39            |                          |    |
|                                                                   | 497    | 0.002 | -46   | -48   | 30              | Inferior Parietal Lobule | 40            |                          |    |
|                                                                   |        |       | -60   | -62   | 32              | Superior Temporal Gyrus  | 39            |                          |    |
|                                                                   |        |       | 2     | -34   | 28              | Cingulate Gyrus          | 23            |                          |    |
|                                                                   |        |       | -6    | -8    | 44              | Cingulate Gyrus          | 24            |                          |    |
| -6                                                                |        |       | -8    | 40    | Cingulate Gyrus | 24                       |               |                          |    |

|                  |      |       |     |     |     |                            |    |
|------------------|------|-------|-----|-----|-----|----------------------------|----|
|                  |      |       | -6  | -22 | 28  | Cingulate Gyrus            | 23 |
|                  |      |       | 0   | -28 | 34  | Cingulate Gyrus            | 31 |
|                  |      |       | -4  | -12 | 48  | Paracentral Lobule         | 31 |
|                  | 505  | 0.002 | -66 | -52 | 4   | Middle Temporal Gyrus      | 21 |
|                  |      |       | -66 | -52 | 10  | Middle Temporal Gyrus      | 21 |
|                  |      |       | -70 | -38 | 14  | Superior Temporal Gyrus    | 22 |
|                  |      |       | -54 | -28 | 12  | Superior Temporal Gyrus    | 41 |
|                  |      |       | -64 | -20 | 12  | Superior Temporal Gyrus    | 42 |
|                  |      |       | -56 | -36 | 12  | Superior Temporal Gyrus    | 42 |
|                  | 669  | 0.000 | 20  | -82 | 42  | Cuneus                     | 19 |
|                  |      |       | 28  | -64 | 46  | Superior Parietal Lobule   | 7  |
|                  |      |       | 40  | -72 | 42  | Precuneus                  | 19 |
|                  |      |       | 36  | -80 | 40  | Precuneus                  | 19 |
|                  |      |       | 40  | -76 | 42  | Precuneus                  | 19 |
|                  |      |       | 10  | -84 | 34  | Cuneus                     | 19 |
|                  | 888  | 0.000 | 28  | -86 | 10  | Middle Occipital Gyrus     | 18 |
|                  |      |       | 28  | -90 | 10  | Middle Occipital Gyrus     | 19 |
|                  |      |       | 16  | -68 | -10 | Culmen                     |    |
|                  |      |       | 34  | -82 | -2  | Middle Occipital Gyrus     | 18 |
|                  |      |       | 16  | -54 | -14 | Culmen                     |    |
|                  |      |       | 40  | -70 | -8  | Fusiform Gyrus             | 19 |
|                  | 1097 | 0.000 | 48  | 32  | 6   | Inferior Frontal Gyrus     | 46 |
|                  |      |       | 52  | 32  | 2   | Inferior Frontal Gyrus     | 45 |
|                  |      |       | 26  | 24  | -8  | Lentiform Nucleus: Putamen |    |
|                  |      |       | 54  | 12  | -2  | Superior Temporal Gyrus    | 22 |
|                  |      |       | 44  | 34  | 4   | Inferior Frontal Gyrus     | 13 |
|                  |      |       | 70  | -14 | 6   | Superior Temporal Gyrus    | 42 |
|                  | 1875 | 0.000 | -50 | 16  | -10 | Inferior Frontal Gyrus     | 47 |
|                  |      |       | -40 | 22  | 4   | Insula                     | 13 |
|                  |      |       | -32 | 26  | -6  | Insula                     | 13 |
|                  |      |       | -46 | 50  | -8  | Inferior Frontal Gyrus     | 10 |
|                  |      |       | -46 | 32  | -14 | Inferior Frontal Gyrus     | 47 |
|                  |      |       | -46 | 54  | -10 | Middle Frontal Gyrus       | 10 |
| Control > Stress | 354  | 0.019 | -34 | 40  | -10 | Middle Frontal Gyrus       | 47 |
|                  |      |       | -30 | 48  | -12 | Middle Frontal Gyrus       | 10 |
|                  |      |       | -46 | 44  | -12 | Middle Frontal Gyrus       | 47 |
|                  |      |       | -34 | 60  | -16 | Middle Frontal Gyrus       | 10 |
|                  |      |       | -38 | 44  | -14 | Middle Frontal Gyrus       | 47 |
|                  |      |       | -38 | 60  | -16 | Middle Frontal Gyrus       | 10 |
| M > F            |      |       |     |     |     | No significant clusters    |    |
| Stress > Control |      |       |     |     |     | No significant clusters    |    |

| <b>L Amygdala (See Images in Supplemental Digital Content 5C)</b> |        |       |       |       |       |                         |               |
|-------------------------------------------------------------------|--------|-------|-------|-------|-------|-------------------------|---------------|
| Effect                                                            | Voxels | p     | X MNI | Y MNI | Z MNI | Region                  | Brodmann Area |
| F > M                                                             | 410    | 0.010 | 46    | 20    | 6     | Inferior Frontal Gyrus  | 44            |
|                                                                   |        |       | 36    | 20    | 10    | Insula                  | 13            |
|                                                                   |        |       | 50    | 18    | 8     | Inferior Frontal Gyrus  | 44            |
|                                                                   |        |       | 44    | 34    | -2    | Inferior Frontal Gyrus  | 13            |
|                                                                   |        |       | 40    | 30    | -2    | Inferior Frontal Gyrus  | 47            |
|                                                                   |        |       | 40    | 20    | -8    | Extra-Nuclear           | 47            |
| M > F                                                             |        |       |       |       |       | No significant clusters |               |
| Stress > Control                                                  |        |       |       |       |       | No significant clusters |               |
| Control > Stress                                                  |        |       |       |       |       | No significant clusters |               |

*Supplemental Figure 2.* Psychophysiological interaction (PPI) analyses with face expression (angry versus neutral) as a modulatory variable and A) functionally defined fusiform face area (FFA) as the seed region, B) the right amygdala as the seed region, or C) the left amygdala as the seed region revealed main effects of sex, with females consistently showing greater functional connectivity with the insula than males. The right amygdala PPI also revealed a main effect of stress, with greater functional connectivity for the middle frontal gyrus for the control group than the stress group.

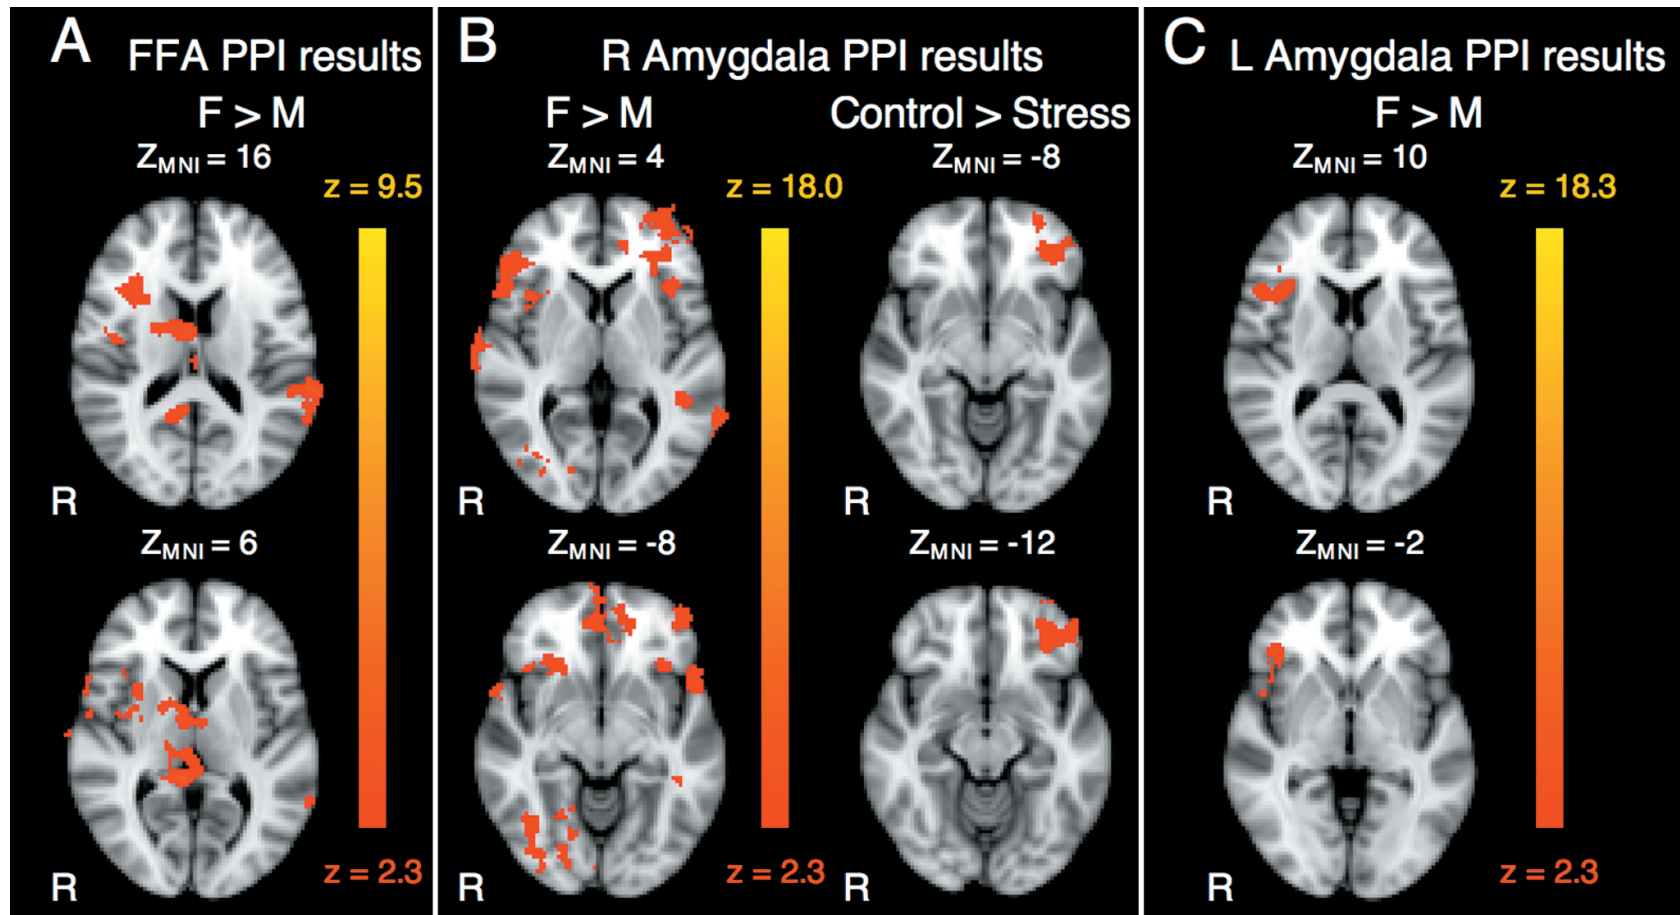

Supplement: NIHMS229212-supplement-1.pdf [file NIHMS229212-supplement-1.pdf]
